# Supplementary material
Source: Springer Nature journal article supplement (https://www.springermedizin.de/resource/supplementary/12935_2011_322_MOESM4_ESM.pdf/9540288)

Treated with Ad/CMV -GFP

Treated with Ad/gTRAIL

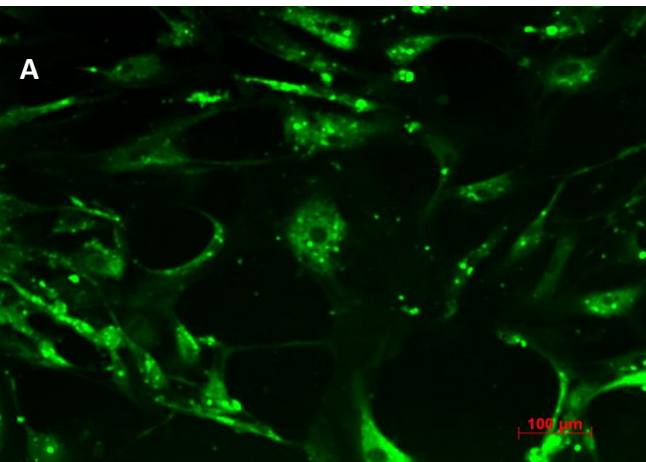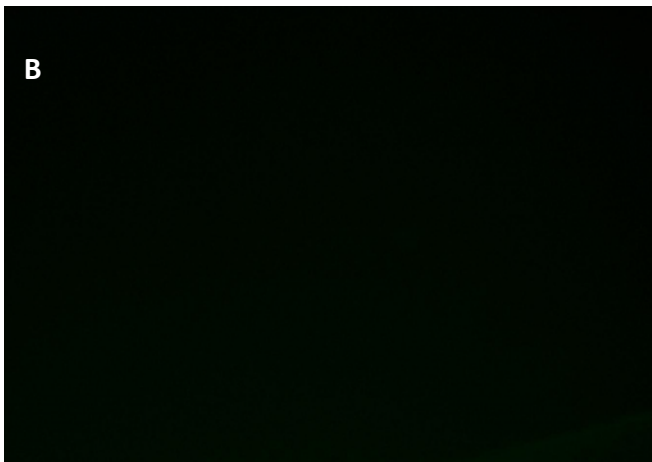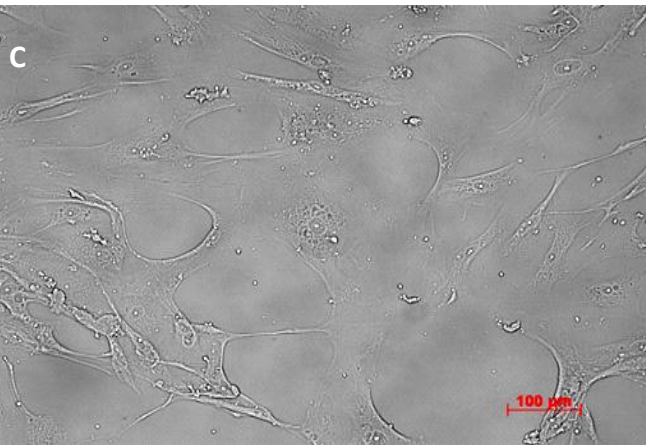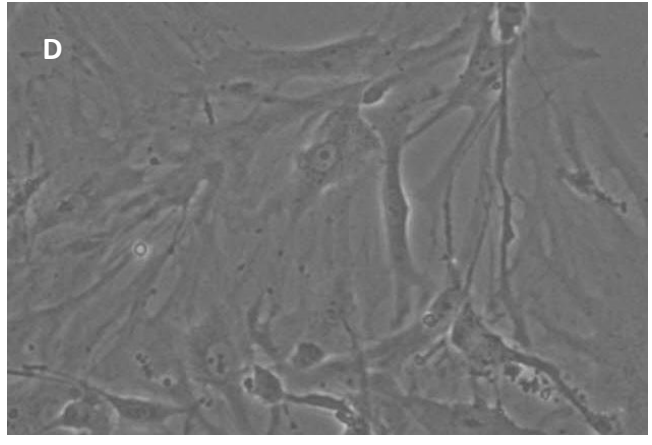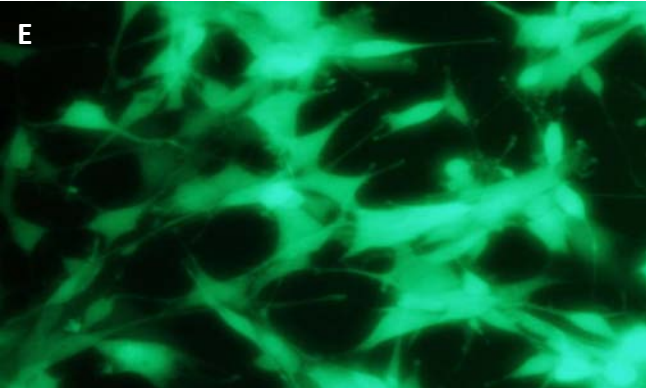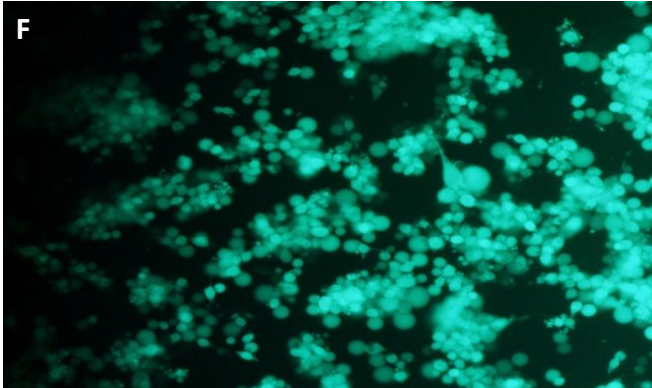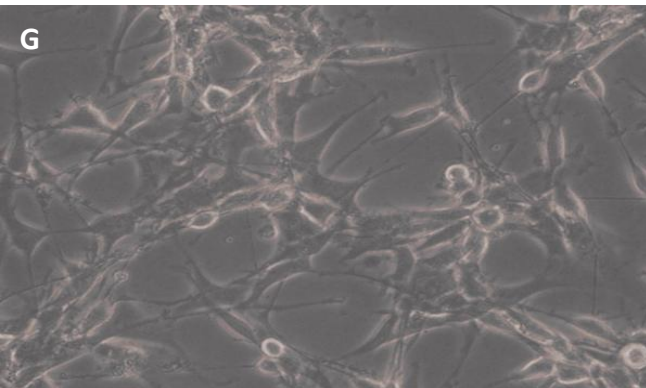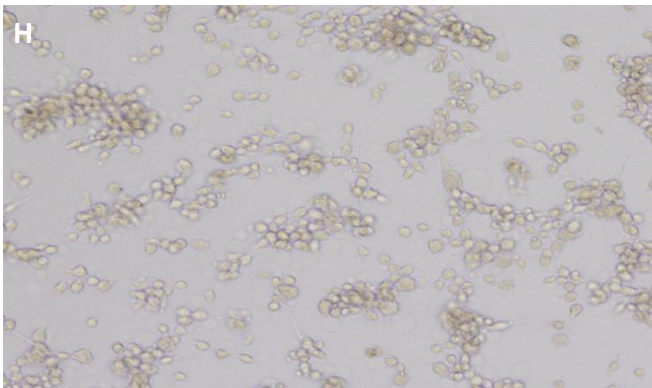

Supplement: MOESM4 [file 9540288]
